# Supplementary material for: Whole‐exome sequencing of a Saudi epilepsy cohort reveals association signals in known and potentially novel loci
Source: Hum Genomics. 2022 Dec 20;16:71. doi: 10.1186/s40246-022-00444-6 (PMC9764464; doi:10.1186/s40246-022-00444-6)
Supplement: Supplementary file 1 — Additional file 1. Supplementary Table S1: outlines additional minor allele frequencies in additional databases and further annotation of these putative pathogenic variants. [file 40246_2022_444_MOESM1_ESM.xlsx]

## Sheet: Epilepsy_Pathogenic_variants
															Supplementary Table S1: outlines additional minor allele frequencies in additional databases and further annotation of these putative pathogenic variants.
CHROM	POS	dbSNP_ID_HGMD_ID	Reference_Allele	Variant_Allele	Patient(s) with Heterozygous Variant	Patient_with_Homozygous_Variant	Variant_Type	Gene	Protein_Information	Cohort_Variant_Allele_Count	Cohort_Variant_Allele_Frequency	Cohort_Variant_Allele_Number	ExAC_Allele_Frequency	Gnomad_popmax_Allele_Frequency	Overlap with 102 Epilepsy Monogenic Genes	HGMD_Mutation_CLASS	HGMD_Mutation_Phenotype	CLINVAR_CLNSIG	CLINVAR_CLNHGVS	CLINVAR_CLNDN	SnpEff_Annotation
chr1	43907014	rs373062274;589892;CM180570	C	T	65	.	Missense	SZT2	NP_056099.3%3Ap.R2435W	1	0.003	288	0.00034	0.00258052	No	DM	Epileptic_encephalopathy%2C_early-onset	Conflicting_interpretations_of_pathogenicity	NC_000001.10:g.43907014C>T	Seizures|Early_infantile_epileptic_encephalopathy_18|not_provided	T|missense_variant|MODERATE|SZT2|SZT2|transcript|NM_001365999.1|protein_coding|53/72|c.7474C>T|p.Arg2492Trp|7544/14136|7474/10299|2492/3432||,T|missense_variant|MODERATE|SZT2|SZT2|transcript|NM_015284.4|protein_coding|52/71|c.7303C>T|p.Arg2435Trp|7373/13965|7303/10128|2435/3375||
chr1	47746675	rs139912214;160052;CM1512217	C	G	94128134	.	Missense	STIL	NP_003026.2%3Ap.L485F	3	0.01	288	0.00213	0.00353774	No	DM	Intellectual_disability%2C_seizures%2C_microcephaly	Conflicting_interpretations_of_pathogenicity	NC_000001.10:g.47746675C>G	Abnormality_of_brain_morphology|Primary_autosomal_recessive_microcephaly_7|Inborn_genetic_diseases|not_specified|not_provided	G|missense_variant|MODERATE|STIL|STIL|transcript|NM_001048166.1|protein_coding|12/17|c.1455G>C|p.Leu485Phe|1610/5019|1455/3867|485/1288||,G|missense_variant|MODERATE|STIL|STIL|transcript|NM_001282936.1|protein_coding|13/18|c.1455G>C|p.Leu485Phe|1819/5225|1455/3864|485/1287||,G|missense_variant|MODERATE|STIL|STIL|transcript|NM_001282937.1|protein_coding|13/18|c.1455G>C|p.Leu485Phe|1819/5174|1455/3…
chr1	97915614	rs3918290;432;CS961553	C	T	101141	.	Splicing	DPYD	.	2	0.007	288	.	0.00706691	No	DM	Dihydropyrimidine_dehydrogenase_deficiency	drug_response	NC_000001.10:g.97915614C>T	Macroglossia|Thick_lower_lip_vermilion|Mandibular_prognathia|Frontal_bossing|Coarse_facial_features|Bulbous_nose|Widely_spaced_teeth|Autistic_disorder_of_childhood_onset|Aggressive_behavior|Intellectual_disability|Global_developmental_delay|Seizures|Short_toe|Hallux_valgus|2-3_toe_syndactyly|Clinodactyly_of_the_5th_toe|Cognitive_impairment|Intellectual_disability,_profound|Abnormal_aggressive,_im…	T|splice_donor_variant&intron_variant|HIGH|DPYD|DPYD|transcript|NM_000110.4|protein_coding|14/22|c.1905+1G>A||||||
chr1	119683231	rs139548132;440915;CM179445	A	C	70129135	.	Missense	WARS2	NP_056651.1%3Ap.W13G	3	0.01	288	.	0.00615923	No	DM	Intellectual_disability	Conflicting_interpretations_of_pathogenicity	NC_000001.10:g.119683231A>C	Neurodevelopmental_disorder,_mitochondrial,_with_abnormal_movements_and_lactic_acidosis,_with_or_without_seizures|not_provided	C|missense_variant|MODERATE|WARS2|WARS2|transcript|NM_015836.3|protein_coding|1/6|c.37T>G|p.Trp13Gly|65/2806|37/1083|13/360||,C|missense_variant|MODERATE|WARS2|WARS2|transcript|NM_201263.2|protein_coding|1/6|c.37T>G|p.Trp13Gly|65/2835|37/663|13/220||,C|non_coding_transcript_exon_variant|MODIFIER|WARS2-AS1|WARS2-AS1|transcript|NR_125974.1|pseudogene|1/4|n.213A>C||||||,C|non_coding_transcript_exon_…
chr1	160011671	rs558502886;205829;CM179696	G	A	21045	.	Missense	KCNJ10	NP_002232.2%3Ap.L218F	2	0.007	288	.	0.00117925	Yes	DM	Developmental_delay%2C_failure_to_thrive%2C_ataxia%2C_hypotonia_and_tonic-clonic_seizures	Uncertain_significance	NC_000001.10:g.160011671G>A	Pendred_syndrome|Deafness,_autosomal_recessive_4,_with_enlarged_vestibular_aqueduct|EAST_syndrome|not_specified	A|missense_variant|MODERATE|KCNJ10|KCNJ10|transcript|NM_002241.5|protein_coding|2/2|c.652C>T|p.Leu218Phe|791/5205|652/1140|218/379||
chr2	166243269	rs147522594;130214;CM154624	G	C	19	.	Missense	SCN2A	NP_066287.2%3Ap.G1522A	1	0.003	288	0.00073	0.00500229	Yes	DM	Epileptic_encephalopathy	Conflicting_interpretations_of_pathogenicity	NC_000002.11:g.166243269G>C	Seizures,_benign_familial_infantile,_3|Early_infantile_epileptic_encephalopathy_11|Episodic_ataxia_type_9|History_of_neurodevelopmental_disorder|not_specified|not_provided	C|missense_variant|MODERATE|SCN2A|SCN2A|transcript|NM_001040142.2|protein_coding|26/27|c.4565G>C|p.Gly1522Ala|4843/8776|4565/6018|1522/2005||,C|missense_variant|MODERATE|SCN2A|SCN2A|transcript|NM_001040143.2|protein_coding|27/28|c.4565G>C|p.Gly1522Ala|4962/8895|4565/6018|1522/2005||,C|missense_variant|MODERATE|SCN2A|SCN2A|transcript|NM_001371246.1|protein_coding|26/27|c.4565G>C|p.Gly1522Ala|4843/…
chr2	166848930	rs373967247;206851;CM1211388	T	C	69	.	Missense	SCN1A	NP_001159435.1%3Ap.M1619V	1	0.003	288	0.00056	0.0041155	Yes	DM	Intractable_epilepsy	Conflicting_interpretations_of_pathogenicity	NC_000002.11:g.166848930T>C	Severe_myoclonic_epilepsy_in_infancy|not_specified|not_provided	C|missense_variant&splice_region_variant|MODERATE|SCN1A|SCN1A|transcript|NM_001165963.3|protein_coding|29/29|c.4855A>G|p.Met1619Val|5333/13112|4855/6030|1619/2009||,C|missense_variant&splice_region_variant|MODERATE|SCN1A|SCN1A|transcript|NM_001165964.3|protein_coding|28/28|c.4771A>G|p.Met1591Val|5162/12941|4771/5946|1591/1981||,C|missense_variant&splice_region_variant|MODERATE|SCN1A|SCN1A|transcr…
chr2	167138296	rs121908919;6367;CM0910315	T	C	85	.	Missense	SCN9A	NP_002968.1%3Ap.K655R	1	0.003	288	0.00189	0.00827423	Yes	DM	Febrile_seizures	Conflicting_interpretations_of_pathogenicity	NC_000002.11:g.167138296T>C	Global_developmental_delay|Seizures|Hypoglycemia|Primary_erythromelalgia|Paroxysmal_extreme_pain_disorder|Indifference_to_pain,_congenital,_autosomal_recessive|Generalized_epilepsy_with_febrile_seizures_plus,_type_7|Hereditary_sensory_and_autonomic_neuropathy_type_IIA|not_specified|none_provided|not_provided	C|missense_variant|MODERATE|SCN9A|SCN9A|transcript|NM_001365536.1|protein_coding|13/27|c.1997A>G|p.Lys666Arg|2295/9750|1997/5967|666/1988||,C|missense_variant|MODERATE|SCN9A|SCN9A|transcript|NM_002977.3|protein_coding|13/27|c.1964A>G|p.Lys655Arg|2305/9760|1964/5934|655/1977||,C|intron_variant|MODIFIER|SCN1A-AS1|SCN1A-AS1|transcript|NR_110260.1|pseudogene|8/11|n.1029+4539T>C||||||
chr3	38739016	rs747321219;567996;CD1921039	CT	C	7039	.	Frame shift	SCN10A	NP_006505.4%3Ap.(Ala1899Glnfs*36)	2	0.007	288	0.0001	0.000129601	No	DM	Refractory_epilepsy_&_autism_spectrum_disorder	Uncertain_significance	NC_000003.11:g.38739017del	Brugada_syndrome	C|frameshift_variant|HIGH|SCN10A|SCN10A|transcript|NM_006514.3|protein_coding|27/27|c.5694delA|p.Ala1899fs|5694/5874|5694/5871|1898/1956||,C|frameshift_variant|HIGH|SCN10A|SCN10A|transcript|NM_001293306.2|protein_coding|27/27|c.5691delA|p.Ala1898fs|5691/5871|5691/5868|1897/1955||,C|frameshift_variant|HIGH|SCN10A|SCN10A|transcript|NM_001293307.2|protein_coding|26/26|c.5400delA|p.Ala1801fs|5400/558…
chr3	132378559	rs151048899;1030879	C	A	9101	.	Stop gained	UBA5	p.Glu13*	2	0.007	288	.	0.00911816	No	.	.	Pathogenic	NC_000003.11:g.132378559C>A	Epileptic_encephalopathy,_early_infantile,_44	A|stop_gained|HIGH|ACAD11|ACAD11|transcript|NM_032169.5|protein_coding|1/20|c.37G>T|p.Glu13*|95/3231|37/2343|13/780||,A|5_prime_UTR_variant|MODIFIER|UBA5|UBA5|transcript|NM_024818.4|protein_coding|1/12|c.-823C>A|||||823|,A|5_prime_UTR_variant|MODIFIER|UBA5|UBA5|transcript|NM_001321239.1|protein_coding|1/10|c.-1023C>A|||||9142|,A|upstream_gene_variant|MODIFIER|UBA5|UBA5|transcript|NM_001320210.1|p…
chr4	119736287	rs730882211;183297;CM150862	C	G	32141	.	Missense	SEC24D	NP_055637.2%3Ap.G233R	2	0.007	288	.	Not observed	No	DM	Intellectual_disability_and_epilepsy	Likely_pathogenic	NC_000004.11:g.119736287C>G	Intellectual_disability|Seizures	G|missense_variant|MODERATE|SEC24D|SEC24D|transcript|NM_001318066.2|protein_coding|6/23|c.700G>C|p.Gly234Arg|927/4021|700/3102|234/1033||,G|missense_variant|MODERATE|SEC24D|SEC24D|transcript|NM_014822.4|protein_coding|6/23|c.697G>C|p.Gly233Arg|924/4018|697/3099|233/1032||
chr8	1719594	rs142269885;205207;CM120925	A	G	71	.	Missense	CLN8	NP_061764.2%3Ap.N125S	1	0.003	288	0.00082	0.00222121	Yes	DM	Neuronal_ceroid_lipofuscinosis%2C_late_infantile	Conflicting_interpretations_of_pathogenicity	NC_000008.10:g.1719594A>G	Intellectual_disability|Seizures|Neuronal_ceroid_lipofuscinosis_8|Neuronal_ceroid_lipofuscinosis|not_specified|not_provided	G|missense_variant|MODERATE|CLN8|CLN8|transcript|NM_018941.4|protein_coding|2/3|c.374A>G|p.Asn125Ser|594/7084|374/861|125/286||
chr10	79396648	CM1710521	G	T		17	Stop gained	KCNMA1	NP_001258449.1%3Ap.C165*	2	0.008	236	.	Not observed	Yes	DM	Epilepsy	.	.	.	T|stop_gained|HIGH|KCNMA1|KCNMA1|transcript|NM_001271520.2|protein_coding|2/2|c.495C>A|p.Cys165*|661/1348|495/642|165/213||,T|splice_region_variant&intron_variant|LOW|KCNMA1|KCNMA1|transcript|NM_001322839.2|protein_coding|2/2|c.491+4C>A||||||,T|intron_variant|MODIFIER|KCNMA1|KCNMA1|transcript|NM_001161352.2|protein_coding|1/27|c.378+375C>A||||||,T|intron_variant|MODIFIER|KCNMA1|KCNMA1|transcript|…
chr11	9225637	rs1057519307;374925;CD1615221	GTC	G	47	.	Frame shift	DENND5A	NP_056028.2%3Ap.(Asp173Profs*8)	1	0.003	288	.	Not observed	No	DM	Epileptic_encephalopathy	Pathogenic	NC_000011.9:g.9225639CT[1]	Epileptic_encephalopathy,_early_infantile,_49	G|frameshift_variant|HIGH|DENND5A|DENND5A|transcript|NM_015213.4|protein_coding|4/23|c.517_518delGA|p.Asp173fs|799/4988|517/3864|173/1287||,G|frameshift_variant|HIGH|DENND5A|DENND5A|transcript|NM_001243254.2|protein_coding|4/23|c.517_518delGA|p.Asp173fs|799/4954|517/3726|173/1241||,G|frameshift_variant|HIGH|DENND5A|DENND5A|transcript|NM_001348749.2|protein_coding|3/22|c.445_446delGA|p.Asp149fs|72…
chr11	93521218	rs775443807;1029810;CM1925600	A	G	87	.	Missense	MED17	NP_004259.3%3Ap.N101S	1	0.003	288	.	0.000114811	No	DM	Seizures_and_hypoplasia_of_the_corpus_callosum	Uncertain_significance	NC_000011.9:g.93521218A>G	Microcephaly,_postnatal_progressive,_with_seizures_and_brain_atrophy	G|missense_variant|MODERATE|MED17|MED17|transcript|NM_004268.5|protein_coding|2/12|c.302A>G|p.Asn101Ser|534/5087|302/1956|101/651||
chr12	42863325	rs113994140;2283;CM085653	C	T	83	.	Missense	PRICKLE1	NP_694571.2%3Ap.R104Q	1	0.003	288	1e-05	0.000641026	Yes	DM	Progressive_myoclonus_epilepsy-ataxia_syndrome	Likely_pathogenic	NC_000012.11:g.42863325C>T	Progressive_myoclonus_epilepsy_with_ataxia|not_provided	T|missense_variant|MODERATE|PRICKLE1|PRICKLE1|transcript|NM_001144881.2|protein_coding|4/8|c.311G>A|p.Arg104Gln|599/5836|311/2496|104/831||,T|missense_variant|MODERATE|PRICKLE1|PRICKLE1|transcript|NM_001144882.2|protein_coding|4/8|c.311G>A|p.Arg104Gln|612/5849|311/2496|104/831||,T|missense_variant|MODERATE|PRICKLE1|PRICKLE1|transcript|NM_001144883.2|protein_coding|4/8|c.311G>A|p.Arg104Gln|609/584…
chr12	52164462	rs769243993;207114;CM183154	G	A	96	.	Missense	SCN8A	NP_055006.1%3Ap.A1214T	1	0.003	288	1e-05	0.000109278	Yes	DM	Paroxysmal_kinesigenic_dyskinesia	Conflicting_interpretations_of_pathogenicity	NC_000012.11:g.52164462G>A	Early_infantile_epileptic_encephalopathy_with_suppression_bursts|not_provided	A|missense_variant|MODERATE|SCN8A|SCN8A|transcript|NM_001330260.2|protein_coding|19/27|c.3640G>A|p.Ala1214Thr|3821/11559|3640/5943|1214/1980||,A|missense_variant|MODERATE|SCN8A|SCN8A|transcript|NM_001369788.1|protein_coding|19/26|c.3640G>A|p.Ala1214Thr|3821/11436|3640/5820|1214/1939||,A|missense_variant|MODERATE|SCN8A|SCN8A|transcript|NM_014191.4|protein_coding|19/27|c.3640G>A|p.Ala1214Thr|3821/1…
chr12	111856571	rs202080221;30445;CM165942	G	C	21037043138	.	Missense	SH2B3	NP_005466.1%3Ap.E208Q	4	0.014	288	0.00099	0.00479616	No	DM	Erythrocytosis%2C_idiopathic	Uncertain_significance	NC_000012.11:g.111856571G>C	Thrombocythemia_1|Developmental_and_epileptic_encephalopathy,_67	C|missense_variant|MODERATE|SH2B3|SH2B3|transcript|NM_005475.3|protein_coding|2/8|c.622G>C|p.Glu208Gln|1004/5431|622/1728|208/575||
chr13	100925464	rs146927771;788170;CM1921245	C	G	48	.	Missense	PCCA	NP_000273.2%3Ap.A310G	1	0.003	288	.	0.000975927	No	DM	Epilepsy_&_neurodevelopmental_delay	Conflicting_interpretations_of_pathogenicity	NC_000013.10:g.100925464C>G	Propionic_acidemia	G|missense_variant|MODERATE|PCCA|PCCA|transcript|NM_000282.4|protein_coding|12/24|c.929C>G|p.Ala310Gly|957/2483|929/2187|310/728||,G|missense_variant|MODERATE|PCCA|PCCA|transcript|NM_001127692.2|protein_coding|11/23|c.851C>G|p.Ala284Gly|957/2486|851/2109|284/702||,G|missense_variant|MODERATE|PCCA|PCCA|transcript|NM_001178004.1|protein_coding|12/23|c.929C>G|p.Ala310Gly|1035/2423|929/2046|310/681||…
chr15	23006299	rs576755299;CI126391	T	TTCA	02, 09, 040, 044, 050, 057, 089	.	In frame insertion	NIPA2	NP_001171818.1%3Ap.(Asn334_Glu335insAsp)	7	0.024	288	.	0.00842624	No	DM	Childhood_absence_epilepsy	.	.	.	TTCA|disruptive_inframe_insertion|MODERATE|NIPA2|NIPA2|transcript|NM_001008860.2|protein_coding|7/7|c.1002_1004dupTGA|p.Asn334_Glu335insAsp|1514/3130|1004/1083|335/360||,TTCA|disruptive_inframe_insertion|MODERATE|NIPA2|NIPA2|transcript|NM_001008892.2|protein_coding|6/6|c.1002_1004dupTGA|p.Asn334_Glu335insAsp|1378/2994|1004/1083|335/360||,TTCA|disruptive_inframe_insertion|MODERATE|NIPA2|NIPA2|tran…
chr15	52632432	rs1114167290;242881;CM168596	G	C	121	.	Missense	MYO5A	NP_000250.3%3Ap.S1400R	1	0.003	288	.	Not observed	No	DM	Developmental_delay%2C_seizures%2C_cerebellar_atrophy%2C_nystagmus_&_dystonia	Pathogenic	NC_000015.9:g.52632432G>C	Nystagmus|Global_developmental_delay|Seizures|Dystonia|Cerebellar_cortical_atrophy	C|missense_variant|MODERATE|MYO5A|MYO5A|transcript|NM_000259.3|protein_coding|32/41|c.4200C>G|p.Ser1400Arg|4444/12224|4200/5568|1400/1855||,C|missense_variant|MODERATE|MYO5A|MYO5A|transcript|NM_001142495.2|protein_coding|31/40|c.4119C>G|p.Ser1373Arg|4193/11973|4119/5487|1373/1828||
chr15	73617728	rs150691273;CM1811475	G	A	127	.	Missense	HCN4	NP_005468.1%3Ap.R550C	1	0.003	288	.	1.75871e-05	No	DM	Myoclonic_epilepsy%2C_benign_infantile	.	.	.	A|missense_variant|MODERATE|HCN4|HCN4|transcript|NM_005477.3|protein_coding|5/8|c.1648C>T|p.Arg550Cys|2336/6922|1648/3612|550/1203||
chr15	89866693	rs138457939;206516;CM114722	T	C	49	.	Missense	POLG	NP_002684.1%3Ap.N736S	1	0.003	288	0.00036	0.00116894	Yes	DM	Depression%2C_ataxia_and_cardiomyopathy	Conflicting_interpretations_of_pathogenicity	NC_000015.9:g.89866693T>C	Intellectual_disability|Seizures|Progressive_sclerosing_poliodystrophy|Progressive_external_ophthalmoplegia_with_mitochondrial_DNA_deletions,_autosomal_recessive_1|Mitochondrial_DNA_depletion_syndrome_1_(MNGIE_type)|Sensory_ataxic_neuropathy-dysarthria-ophthalmoparesis_syndrome|Mitochondrial_DNA_depletion_syndrome_4B,_MNGIE_type|Autosomal_dominant_progressive_external_ophthalmoplegia_with_mitocho…	C|missense_variant|MODERATE|POLG|POLG|transcript|NM_001126131.2|protein_coding|13/23|c.2207A>G|p.Asn736Ser|2506/4444|2207/3720|736/1239||,C|missense_variant|MODERATE|POLG|POLG|transcript|NM_002693.2|protein_coding|13/23|c.2207A>G|p.Asn736Ser|2489/4448|2207/3720|736/1239||,C|downstream_gene_variant|MODIFIER|MIR6766|MIR6766|transcript|NR_106824.1|pseudogene||n.*3277A>G|||||3277|
chr15	89870429	rs145843073;206596;CM042458	T	C	30	.	Missense	POLG	NP_002684.1%3Ap.N468D	1	0.003	288	0.00044	0.00235849	Yes	DM	Progressive_external_ophthalmoplegia	Conflicting_interpretations_of_pathogenicity	NC_000015.9:g.89870429T>C	Intellectual_disability|Seizures|Progressive_sclerosing_poliodystrophy|Progressive_external_ophthalmoplegia_with_mitochondrial_DNA_deletions,_autosomal_recessive_1|Mitochondrial_DNA_depletion_syndrome_1_(MNGIE_type)|Sensory_ataxic_neuropathy-dysarthria-ophthalmoparesis_syndrome|Mitochondrial_DNA_depletion_syndrome_4B,_MNGIE_type|Lennox-Gastaut_syndrome|Autosomal_dominant_progressive_external_opht…	C|missense_variant|MODERATE|POLG|POLG|transcript|NM_001126131.2|protein_coding|7/23|c.1402A>G|p.Asn468Asp|1701/4444|1402/3720|468/1239||,C|missense_variant|MODERATE|POLG|POLG|transcript|NM_002693.2|protein_coding|7/23|c.1402A>G|p.Asn468Asp|1684/4448|1402/3720|468/1239||,C|upstream_gene_variant|MODIFIER|MIR6766|MIR6766|transcript|NR_106824.1|pseudogene||n.-388A>G|||||388|
chr15	89876827	rs41550117;206481;CD197484	TTGCTGCTGC	T	32	.	In frame insertion	POLG	NP_002684.1%3Ap.(Gln53_Gln55del)	1	0.003	288	.	0.00451613	Yes	DM	Hepatic_encephalopathy	Benign/Likely_benign	NC_000015.9:g.89876828TGC[8]	Seizures|Progressive_sclerosing_poliodystrophy|Mitochondrial_DNA_depletion_syndrome_4B,_MNGIE_type|not_specified	T|disruptive_inframe_deletion|MODERATE|POLG|POLG|transcript|NM_001126131.2|protein_coding|2/23|c.150_158delGCAGCAGCA|p.Gln51_Gln53del|457/4444|150/3720|50/1239||,T|disruptive_inframe_deletion|MODERATE|POLG|POLG|transcript|NM_002693.2|protein_coding|2/23|c.150_158delGCAGCAGCA|p.Gln51_Gln53del|440/4448|150/3720|50/1239||
chr16	150392	rs200041907;847079;CM160813	C	T	112	.	Missense	NPRL3	NP_001070818.1%3Ap.E249K	1	0.003	288	.	0.000933271	No	DM	Focal_epilepsy	Uncertain_significance	NC_000016.9:g.150392C>T	Epilepsy,_familial_focal,_with_variable_foci_3	T|missense_variant|MODERATE|NPRL3|NPRL3|transcript|NM_001077350.3|protein_coding|8/14|c.745G>A|p.Glu249Lys|844/3125|745/1707|249/568||,T|missense_variant|MODERATE|NPRL3|NPRL3|transcript|NM_001039476.2|protein_coding|5/11|c.208G>A|p.Glu70Lys|971/2833|208/1170|70/389||,T|missense_variant|MODERATE|NPRL3|NPRL3|transcript|NM_001243247.1|protein_coding|9/15|c.511G>A|p.Glu171Lys|1006/2868|511/1473|171/4…
chr16	28500627	rs769840061;205104;CM2016279	G	A	104	.	Missense	CLN3	NP_001035897.1%3Ap.S69L	1	0.003	288	4e-05	0.00020337	Yes	DM	Retinal_degeneration	Uncertain_significance	NC_000016.9:g.28500627G>A	Seizures|Neuronal_ceroid_lipofuscinosis_3|Neuronal_ceroid_lipofuscinosis|not_provided	A|missense_variant|MODERATE|CLN3|CLN3|transcript|NM_000086.2|protein_coding|3/15|c.206C>T|p.Ser69Leu|529/1877|206/1317|69/438||,A|missense_variant|MODERATE|CLN3|CLN3|transcript|NM_001286109.2|protein_coding|2/14|c.44C>T|p.Ser15Leu|442/1783|44/1083|15/360||,A|missense_variant|MODERATE|CLN3|CLN3|transcript|NM_001286104.2|protein_coding|4/15|c.206C>T|p.Ser69Leu|337/3541|206/1245|69/414||,A|missense_…
chr17	61791402	rs55695051;433134	G	A	84	.	Missense	STRADA	.	1	0.003	288	.	Not observed	No	.	.	Pathogenic	NC_000017.10:g.61791402G>A	Rolandic_epilepsy	A|missense_variant|MODERATE|STRADA|STRADA|transcript|NM_001003787.4|protein_coding|5/13|c.190C>T|p.Pro64Ser|293/2166|190/1296|64/431||,A|missense_variant|MODERATE|STRADA|STRADA|transcript|NM_001003786.3|protein_coding|3/11|c.79C>T|p.Pro27Ser|369/2242|79/1185|27/394||,A|missense_variant|MODERATE|STRADA|STRADA|transcript|NM_001003788.3|protein_coding|4/12|c.16C>T|p.Pro6Ser|451/2324|16/1122|6/373||,…
chr19	14024452	rs876657679;228325;CS1414954	G	T	71	.	Splicing	CC2D1A	.	1	0.003	288	.	Not observed	No	DM	Autism_spectrum_disorder%2C_intellectual_disability%2C_and_seizures	Pathogenic	NC_000019.9:g.14024452G>T	Mental_retardation,_autosomal_recessive_3|Mental_Retardation,_Psychosocial|not_provided	T|splice_donor_variant&intron_variant|HIGH|CC2D1A|CC2D1A|transcript|NM_017721.5|protein_coding|6/28|c.748+1G>T||||||
chr20	61981924	rs121909580;17498;CM950259	G	A	55098106121	.	Missense	CHRNA4	NP_000735.1%3Ap.S280F	4	0.014	288	.	Not observed	Yes	DM	Epilepsy%2C_nocturnal_frontal_lobe	Pathogenic	NC_000020.10:g.61981924G>A	Epilepsy,_nocturnal_frontal_lobe,_type_1|Autosomal_dominant_nocturnal_frontal_lobe_epilepsy|not_provided	A|missense_variant|MODERATE|CHRNA4|CHRNA4|transcript|NM_000744.6|protein_coding|5/6|c.839C>T|p.Ser280Phe|1070/5543|839/1884|280/627||,A|missense_variant|MODERATE|CHRNA4|CHRNA4|transcript|NM_001256573.2|protein_coding|5/6|c.311C>T|p.Ser104Phe|954/5514|311/1356|104/451||,A|non_coding_transcript_exon_variant|MODIFIER|CHRNA4|CHRNA4|transcript|NR_046317.2|pseudogene|5/6|n.1048C>T||||||
chr21	34003387	rs2230767;478361;CM210154	G	A	141	.	Missense	SYNJ1	NP_003886.3%3Ap.P1586L	1	0.003	288	0.00082	0.00860289	No	DM	Parkinson_disease	Likely_benign	NC_000021.8:g.34003387G>A	Parkinson_disease_20,_early-onset|Epileptic_encephalopathy,_early_infantile,_53|not_provided	A|missense_variant|MODERATE|SYNJ1|SYNJ1|transcript|NM_003895.3|protein_coding|32/32|c.4757C>T|p.Pro1586Leu|4757/7075|4757/4839|1586/1612||,A|missense_variant|MODERATE|SYNJ1|SYNJ1|transcript|NM_001160306.2|protein_coding|28/28|c.4499C>T|p.Pro1500Leu|4606/6920|4499/4581|1500/1526||,A|3_prime_UTR_variant|MODIFIER|SYNJ1|SYNJ1|transcript|NM_001160302.1|protein_coding|32/32|c.*728C>T|||||3787|,A|3_prim…
chr22	32188751	rs587776976;50824;CM134024	C	T	19	.	Stop gained	DEPDC5	NP_001229825.1%3Ap.R239*	1	0.003	288	.	Not observed	Yes	DM	Epilepsy%2C_familial_focal_with_variable_foci	Pathogenic	NC_000022.10:g.32188751C>T	Familial_focal_epilepsy_with_variable_foci|Epilepsy,_familial_focal,_with_variable_foci_1|not_provided	T|stop_gained|HIGH|DEPDC5|DEPDC5|transcript|NM_001242896.3|protein_coding|12/43|c.715C>T|p.Arg239*|921/6554|715/4812|239/1603||,T|stop_gained|HIGH|DEPDC5|DEPDC5|transcript|NM_001136029.3|protein_coding|12/43|c.715C>T|p.Arg239*|804/5392|715/4785|239/1594||,T|stop_gained|HIGH|DEPDC5|DEPDC5|transcript|NM_001242897.2|protein_coding|12/40|c.715C>T|p.Arg239*|804/5119|715/4512|239/1503||,T|stop_gained|H…
